# Supplementary material for: Mycobacterium tuberculosis Universal Stress Protein Rv2623 Regulates Bacillary Growth by ATP-Binding: Requirement for Establishing Chronic Persistent Infection
Source: PubMed Central journal article supplement (PMC2682197; doi:10.1371/journal.ppat.1000460), 2009-05-29
Supplement: ppat.1000460.s005.pdf [file ppat.1000460.s005.pdf]

## Protocol S1

**Semiquantitative Scoring System for Immunopathology of Guinea Pig Tissues.** Hematoxylin & Eosin-stained lung sections from guinea pigs infected with *M. tuberculosis* were scored individually based on the above system. The Total Lung Score for each animal represents the summation of the scores for each criterion; the maximum score for each animal is 24.

**Percent of lung affected** estimated at low magnification (2-4X obj.); scored as follows:

- 0 - no lesions in lung sections
- 1 - up to 25% of lung involved
- 2 - up to 50 % of lung involved
- 3 - Up to 75% of lung involved
- 4 - Above 75% of lung involved

Character of lesions were scores as follows:

### Primary lesions

- 0 - No primary lesions present at section level
- 1 - A single primary lesion
- 2 - Two or more primary lesions, multifocal
- 3 - Two or more primary lesions, multifocal to coalescing
- 4 - Primary lesions, coalescing and extensive

### Secondary lesions

- 1 - Up to 25% of lung involved
- 2 - Up to 50% of lung involved
- 3 - Up to 75% of lung involved
- 4 - Above 75% of lung involved

### Necrosis

- 0 - No apparent necrosis present
- 1 - A single focus of necrosis present
- 2 - Two or more foci of necrosis, multifocal
- 3 - Two or more foci of necrosis, multifocal to coalescing
- 4 - Coalescing foci of necrosis that are extensive

### Mineralization

- 0 - No mineralization present at section level
- 1 - A single focus of mineralization present
- 2 - Two or more foci of mineralization, multifocal
- 3 - Two or more foci of mineralization, multifocal to coalescing
- 4 - Coalescing foci of mineralization that are extensive

**Fibrosis** (scored relative to the cellularity of primary and secondary lesions)

- 0 - No fibrosis present
- 1 - Minimal fibrosis present
- 2 - Equal area of cellularity and fibrosis
- 3 - More fibrosis than cellularity
- 4 - Extensive fibrosis with low cellularity

**Maximum lung score: 24**

## Crystallography: Summary of Data Collection and Refinement Statistics.

|                                                                         |                                                                   |
|-------------------------------------------------------------------------|-------------------------------------------------------------------|
| <b>Space Group</b>                                                      | <b>C222<sub>1</sub></b>                                           |
| <b>Unit Cell Parameters (Å)</b>                                         | <b><i>a</i> = 173.0<br/><i>b</i> = 241.5<br/><i>c</i> = 241.7</b> |
| <b>Data Collection Statistics:</b>                                      |                                                                   |
| <b>Wavelength (Å)</b>                                                   | <b>1.08</b>                                                       |
| <b>Resolution (Å)</b>                                                   | <b>140- 2.9</b>                                                   |
| <b>Reflections measures</b>                                             | <b>694890</b>                                                     |
| <b>Unique reflections</b>                                               | <b>111196</b>                                                     |
| <sup>a</sup> <b>R<sub>merge</sub> (%)</b>                               | <b><sup>b</sup>9.5(37.3)</b>                                      |
| <b>Completeness (%)</b>                                                 | <b>99.2(98.4)</b>                                                 |
| <b>Refinement Statistics</b>                                            |                                                                   |
| <b>Total number of atoms</b>                                            | <b>19011</b>                                                      |
| <b>Protein</b>                                                          | <b>18139</b>                                                      |
| <b>ATP</b>                                                              | <b>496</b>                                                        |
| <b>Mg<sup>2+</sup></b>                                                  | <b>16</b>                                                         |
| <b>Solvent</b>                                                          | <b>360</b>                                                        |
| <b>Average Thermal Factors (Å<sup>2</sup>)</b>                          |                                                                   |
| <b>Protein</b>                                                          | <b>47.6</b>                                                       |
| <b>ATP</b>                                                              | <b>32.8</b>                                                       |
| <b>Mg<sup>2+</sup></b>                                                  | <b>31.5</b>                                                       |
| <b>Solvent</b>                                                          | <b>41.7</b>                                                       |
| <b>RMS Deviation from Ideality</b>                                      |                                                                   |
| <b>Bond lengths (Å)</b>                                                 | <b>0.01</b>                                                       |
| <b>Bond Angles (°)</b>                                                  | <b>0.98</b>                                                       |
| <b>Ramachandran Plot Regions (%)</b>                                    |                                                                   |
| <b>Most favored</b>                                                     | <b>91.1</b>                                                       |
| <b>Additional allowed</b>                                               | <b>8.3</b>                                                        |
| <b>Generously allowed</b>                                               | <b>0.6</b>                                                        |
| <sup>c</sup> <b>R<sub>factor</sub>/<sup>d</sup>R<sub>free</sub> (%)</b> | <b>25.0/26.8<br/>(35.0/40.1)</b>                                  |

<sup>a</sup> $R_{\text{merge}} (\%) = \frac{\sum_{hkl} \sum_i |I_{hkl} - \langle I \rangle_{hkl}|}{\sum_{hkl} \sum_i \langle I \rangle_{hkl}} \times 100$ ; where  $I_{hkl}$  is the intensity measurement of a given reflection and  $\langle I \rangle_{hkl}$  is the average intensity for multiple measurements of this reflection.

<sup>b</sup>Values in parentheses refer to the highest resolution bin.

<sup>c</sup> $R_{\text{factor}} (\%) = \frac{|F_{o_{hkl}} - F_{c_{hkl}}|}{|F_{o_{hkl}}|} \times 100$ ; where  $F_{o_{hkl}}$  is the observed structure factor amplitude and  $F_{c_{hkl}}$  is the calculated structure factor amplitude.

<sup>d</sup> $R_{\text{free}}$  was calculated for 5 % of the diffraction data and monitored throughout refinement.
